# Supplementary material
Source: PubMed Central journal article supplement (PMC5145786)
Supplement: NIHMS802836-supplement-01.pdf [file NIHMS802836-supplement-01.pdf]

**Online Repository Material for:** *A humanized mouse model of anaphylactic peanut allergy*

## **METHODS**

### **Mice**

WT BALB/c and IgE<sup>-/-</sup> (*Igh-7<sup>-/-</sup>*) mice were bred under specific pathogen-free conditions in a biosafety level 1 facility. Age-matched controls were used for experiments at 8-12 weeks of age.

### **Passive anaphylaxis**

IgE-mediated anaphylaxis was assessed following passive sensitization of IgE<sup>-/-</sup> mice with mouse or human IgE. Mice were injected intravenously via the retro-orbital sinus with 10µg IgE from mouse (IgE anti-DNP clone SPE-7, Sigma-Aldrich) or human (chimeric IgE anti-NP clone JW8/1, AbD Serotec), and challenged 72hrs later by intraperitoneal injection with 500µg of the respective antigen (TNP-albumin from Sigma-Aldrich or NP-OVA from Biosearch Technologies).

### **Mast Cell Culture and Degranulation.**

Mast cells were cultured from humanized mouse splenocytes or bone marrow under stimulation with recombinant human IL-3 and SCF (100ng/ml each, Shenandoah Biotechnology) with weekly passage. Purity was assessed by flow cytometry, staining against human FcεRI and c-Kit. Sera from peanut-allergic donors were collected under IRB protocols approved by Boston Children's Hospital, with written informed consent from all donors<sup>1</sup>. Mast cell degranulation assays using LAMP-1 as a read-out were performed according to procedures we have established for mouse and human basophil activation<sup>1</sup>. Mast cells were sensitized overnight with peanut-allergic serum containing 12 kU/L anti-PN IgE in 100µl final volume. Cells were stimulated for 10min at 37°C with 4 µg/ml aqueous peanut extract in the presence of anti-LAMP-1 antibody (0.5µg/ml). Cells were promptly washed with cold buffer containing azide and analyzed by flow cytometry, gating on c-Kit<sup>+</sup> viable cells.

## **Immunization and recall**

huNSG mice were immunized to tetanus by i.p. injection with 1 µg tetanus toxoid (Calbiochem) adsorbed to 1mg alum (aluminum hydroxide gel, Sigma-Aldrich) in saline on days 0 and 14, followed by weekly i.p. injections with 1 µg tetanus toxoid. After 8 weeks, mice were sacrificed and splenocytes were fractionated using magnetic selection into mouse CD11c<sup>+</sup>, human CD11c<sup>+</sup> and human CD4<sup>+</sup> cell types. For this purpose, mouse and human Fc gamma receptors were blocked using anti-mouse CD16/32 (clone 93) and human TruStain FcX, followed by staining with PE-conjugated antibodies against mouse CD11c (N418), human CD11c (Bu15) or human CD4 (OKT4) (all Biolegend). Anti-PE microbeads were then used prior to isolation over LS columns (Miltenyi Biotec). Dendritic cells (10<sup>4</sup>) were pulsed overnight with 1 µg/ml tetanus toxoid or 100 µg/ml aqueous peanut extract (made as previously described<sup>2</sup>). Isolated T cells were labeled with CellTrace Violet (Invitrogen/ThermoFisher) according to the manufacturer's instructions, and 2x10<sup>5</sup> cells from immune or non-immune mice were plated with pulsed dendritic cells. Soluble anti-CD3 (2 µg/ml, OKT3, Biolegend) was added as a positive control. After 7 days, cells were stained for CD3, CD4 and viability, and proliferation was assessed in the CD4<sup>+</sup>CD3<sup>+</sup> T cells.

## **Flow Cytometry**

The following additional antibodies were used in flow cytometry experiments for the data in the online repository: APC anti-CD19 (HIB19, Biolegend), PE anti-IL-10 (JES3-19F1, Biolegend), Alexa Fluor 647 anti-LAMP-1 (H4A3, Biolegend), FITC anti-mouse I-A<sup>k</sup>/I-A<sup>g7</sup> (10-3.6, Biolegend), PE-Cy7 anti-HLA-DR (L243, Biolegend), PE anti-human CD11c (Bu15, Biolegend), PE-Dazzle594 anti-mouse CD11c (N418, Biolegend), FITC anti-mouse c-Kit (2B8, BD Pharmingen), PerCP-Cy5.5 anti-mouse CD49b (DX5, Biolegend), PE-Cy7 anti-mouse FcεRI (MAR-1, Biolegend), and PE-Cy7 anti-human CD4 (OKT4, Biolegend).

## **ELISAs**

Total serum immunoglobulin levels were assessed by direct ELISA. Immunosorp ELISA plates (Nunc) were coated overnight with sera diluted in PBS, washed, blocked with 2% BSA and specific isotypes were detected with the following biotinylated isotype-specific antibodies: IgG1 (G17-1, BD Pharmingen), IgG2 (G18-21, BD Pharmingen), IgG3 (HP6047, Invitrogen/Thermo Fisher), IgG4 (G17-4, BD Pharmingen), IgA1/2 (G20-359, BD Pharmingen), IgD (goat polyclonal, Southern Biotechnology), IgM (goat polyclonal, Southern Biotechnology), and IgE (G7-26, BD Pharmingen). Purified IgM (Sigma-Aldrich), IgD (Athens Research), IgG1 (Sigma-Aldrich), IgG3 (Sigma-Aldrich), IgE (Abcam) and IgG4 (Affymetrix eBioscience) were purchased for use as standards. Chimeric IgG2 (clone JW183) and IgA (JW393A) for use as standards were obtained from AbD Serotec. PN-specific IgG isotypes were assessed by capture onto plates coated with peanut extract and detected using the isotype-specific antibodies described above. PN-specific IgG levels were quantified relative to a standard curve developed from peanut-allergic patient serum for which the isotype-specific levels of anti-peanut immunoglobulins had previously been roughly determined<sup>1</sup>. Total murine IgE was measured using goat polyclonal anti-mouse IgE (Southern Biotechnology) to capture and biotinylated anti-mouse IgE (R35-92, BD Pharmingen) to detect with IgE anti-TNP as a standard (clone C38-2, BD Pharmingen). Mouse mast cell protease-1 (MMCP-1) was quantified by ELISA according to the manufacturer's instructions (Affymetrix eBioscience).

## **Histology.**

Tissue samples were fixed overnight in 10% formalin (Sigma-Aldrich) prior to processing and paraffin embedding at the Beth Israel Deaconess Medical Center Histology Core. Chloroacetate esterase staining with hematoxylin counter stain was performed as previously described<sup>3</sup>. Photomicrographs were taken through a Nikon E800 Eclipse microscope. Mast cells were

counted by an observer unaware of the samples' identities, and normalized to tissue area as measured using Image J software.

## FIGURE LEGENDS

**Figure E1.** Analysis of mast cells in NSG SCF mice. CAE-stained sections of paraffin-embedded tissue are shown with insets highlighting example mast cells. Jejunal micrographs were taken at 20x magnification (scale bar indicates 100µm).

**Table E2.** Comparison of mast cell burden in huNSG mice to literature-reported values on adult humans.

|           | <u>Human literature values</u>                                                                               |                                                                                                        | <u>Experimental mouse values</u> |          |
|-----------|--------------------------------------------------------------------------------------------------------------|--------------------------------------------------------------------------------------------------------|----------------------------------|----------|
|           | Healthy                                                                                                      | Atopic/Disease                                                                                         | NSG SCF                          | huNSG    |
| Lung      | 44±8 <sup>4</sup><br>44.7 <sup>5</sup><br>155±21 <sup>6</sup>                                                | 84±7 <sup>4</sup><br>91-102 <sup>5</sup><br>270±51 <sup>6</sup><br>250±60 <sup>7</sup>                 | 4±1                              | 67±55    |
| Intestine | 187±23 <sup>8</sup><br>146±29 <sup>9</sup><br>38±13 <sup>10</sup><br>268 <sup>#11</sup><br>47 <sup>§11</sup> | 413±139 <sup>8</sup><br>243±41 <sup>9</sup>                                                            | 0 (n.d.)                         | 256±140* |
| Stomach   | 60±25 <sup>12</sup>                                                                                          | 135±103 <sup>12</sup>                                                                                  | 13±8                             | 111±24*  |
| Skin      | 38.4±4 <sup>13</sup><br><br>48±3 <sup>14</sup><br>50±2 <sup>14</sup>                                         | 71.8±13 <sup>13A</sup><br>596.5±278 <sup>13B</sup><br>720.6±176 <sup>13C</sup><br>142±69 <sup>15</sup> | 57±10                            | 98±6*    |

Values indicate mean±SEM counts of mast cells per mm<sup>2</sup> by histological analysis. n.d., not detected.

\*Statistically significant increase compared to unengrafted NSG SCF mouse.

<sup>4</sup>Farmer's lung.

<sup>5</sup>Extrinsic allergic alveolitis (hypersensitivity pneumonitis), 2 patients only.

<sup>6</sup>Nonfatal asthma.

<sup>7</sup>Severe asthma.

<sup>8</sup>Gastritis.

<sup>11#</sup>Carnoy's fixative. <sup>§</sup>Formalin fixation.

<sup>12</sup>Atopic/oral allergy syndrome.

<sup>13</sup>A) Unexplained anaphylaxis, B) urticaria pigmentosa, C) systemic mastocytosis.

<sup>15</sup>Atopic dermatitis.

**Figure E3.** Analysis of possible contributions of murine mast cells and IgE to anaphylaxis in NSG SCF mice. **A.** Representative panels showing flow cytometric identification of residual murine mast cells in humanized NSG SCF mice. **B.** Quantification of human and murine mast cells by flow cytometry. **C.** Serum levels of murine IgE and MMCP-1 in NSG SCF and immunocompetent mice. Values from huNSG mice are from sera post-challenge with PN. **D.** Assessment of the anaphylactogenic capacity of human and mouse IgE in the murine system. IgE-deficient *Igh7<sup>-/-</sup>* BALB/c mice ( $n=5$ ) were passively sensitized with human  $\alpha$ NP IgE or mouse IgE  $\alpha$ NP IgE and challenged. Anaphylaxis was assessed by measurement of core body temperature and mast cell degranulation followed by determining serum MMCP-1 levels.  $P<0.0001$  by 2-way ANOVA. **E.** Anaphylactogenic capacity of human and murine IgE in NSG SCF mice ( $n=4$ ) without human immune engraftment. **F.** Anaphylaxis elicited by human  $\alpha$ NP IgE and antigen challenge in a CD34<sup>+</sup> stem cell (HSC)-engrafted huNSG mouse. **G.** Serum MMCP-1 levels elicited by antigen challenge of human or murine IgE-sensitized mice. Data are representative of two independent experiments. \*\*\* $P<0.001$  by unpaired t test (B) or Bonferroni post-test on ANOVA (E). n.d., not detected.

**Figure E4.** Serum antibody levels in humanized mice. **A.** ELISA determination of total serum levels of human IgE, IgA, IgD and IgM. **B.** Serum levels of IgG isotypes. Note that omalizumab ( $\alpha$ IgE) is an IgG1 monoclonal. **C.** Serum levels of PN-specific IgG isotypes. The data shown summarize three independent experiments.

**Figure E5.** Analysis of murine and human dendritic cells in humanized NSG SCF mice. Flow cytometric identification of murine CD11c<sup>+</sup>MHCII<sup>+</sup> dendritic cells, and quantification of MHCII expression in **A.** the spleen and **B.** the jejunum. Representative flow cytometry plots showing human CD11c<sup>+</sup>HLA-DR<sup>+</sup> dendritic cells in the spleen and quantification of HLA-DR expression in **C.** the spleen and **D.** the jejunum. Data are representative of two experiments.

**Figure E6.** Presentation of antigens to human CD4<sup>+</sup> T cells in humanized NSG SCF mice. Human CD4<sup>+</sup> T cells from immunized or naïve humanized mice were assessed for recall proliferative responses following presentation of antigen by isolated CD11c<sup>+</sup> dendritic cells of murine or human hematopoietic origin. Representative flow plots show the frequency of dividing (Violet CellTrace<sup>low</sup>) cells among CD4<sup>+</sup>CD3<sup>+</sup> T cells after 7 days of culture. Similar data were obtained in a second experiment.

**Figure E7.** Culture techniques for *in vitro* experiments with human mast cell. **A.** Flow cytometry showing c-Kit and Fc $\epsilon$ RI expression in cultured human splenic mast cells. **B.** CAE-stained cultured human splenic mast cells **C.** *In vitro* degranulation (LAMP-1) following sensitization with peanut-allergic patient serum and peanut stimulation using culture splenic and bone marrow-derived mast cells. Data are representative of three independent experiments.

## REFERENCES

1. Burton OT, Logsdon SL, Zhou JS, Medina-Tamayo J, Abdel-Gadir A, Noval Rivas M, et al. Oral immunotherapy induces IgG antibodies that act through FcγRIIb to suppress IgE-mediated hypersensitivity. *J Allergy Clin Immunol* 2014; 134:1310-7 e6.
2. Burton OT, Noval Rivas M, Zhou JS, Logsdon SL, Darling AR, Koleoglou KJ, et al. Immunoglobulin E signal inhibition during allergen ingestion leads to reversal of established food allergy and induction of regulatory T cells. *Immunity* 2014; 41:141-51.
3. Burton OT, Darling AR, Zhou JS, Noval-Rivas M, Jones TG, Gurish MF, et al. Direct effects of IL-4 on mast cells drive their intestinal expansion and increase susceptibility to anaphylaxis in a murine model of food allergy. *Mucosal Immunol* 2013; 6:740-50.
4. Pesci A, Bertorelli G, Olivieri D. Mast cells in bronchoalveolar lavage fluid and in transbronchial biopsy specimens of patients with farmer's lung disease. *Chest* 1991; 100:1197-202.
5. Heard BE, Nunn AJ, Kay AB. Mast cells in human lungs. *J Pathol* 1989; 157:59-63.
6. Carroll NG, Mutavdzic S, James AL. Distribution and degranulation of airway mast cells in normal and asthmatic subjects. *Eur Respir J* 2002; 19:879-85.
7. Balzar S, Chu HW, Strand M, Wenzel S. Relationship of small airway chymase-positive mast cells and lung function in severe asthma. *Am J Respir Crit Care Med* 2005; 171:431-9.
8. Beil WJ, Schulz M, McEuen AR, Buckley MG, Walls AF. Number, fixation properties, dye-binding and protease expression of duodenal mast cells: comparisons between healthy subjects and patients with gastritis or Crohn's disease. *Histochem J* 1997; 29:759-73.
9. Strobel S, Busuttill A, Ferguson A. Human intestinal mucosal mast cells: expanded population in untreated coeliac disease. *Gut* 1983; 24:222-7.
10. Bacci S, Fausone-Pellegrini S, Mayer B, Romagnoli P. Distribution of mast cells in human ileocecal region. *Dig Dis Sci* 1995; 40:357-65.
11. Strobel S, Miller HR, Ferguson A. Human intestinal mucosal mast cells: evaluation of fixation and staining techniques. *J Clin Pathol* 1981; 34:851-8.
12. Bagnato GF, Di Cesare E, Caruso RA, Gulli S, Cugliari A, Morabito Lo Prete A, et al. Gastric mucosal mast cells in atopic subjects. *Allergy* 1995; 50:322-7.
13. Garriga MM, Friedman MM, Metcalfe DD. A survey of the number and distribution of mast cells in the skin of patients with mast cell disorders. *J Allergy Clin Immunol* 1988; 82:425-32.
14. Eady RA, Cowen T, Marshall TF, Plummer V, Greaves MW. Mast cell population density, blood vessel density and histamine content in normal human skin. *Br J Dermatol* 1979; 100:623-33.
15. Ackermann L, Harvima IT. Mast cells of psoriatic and atopic dermatitis skin are positive for TNF-α and their degranulation is associated with expression of ICAM-1 in the epidermis. *Arch Dermatol Res* 1998; 290:353-9.

No HSC

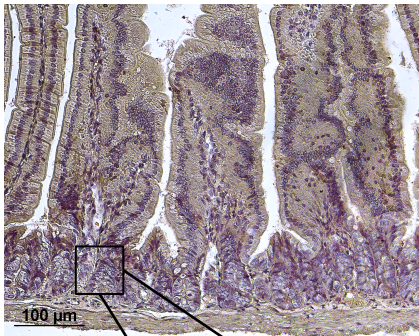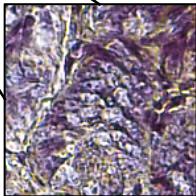

HSC, saline

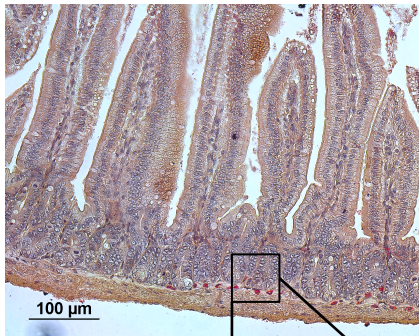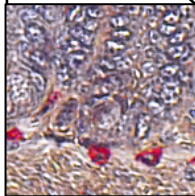

HSC, PN

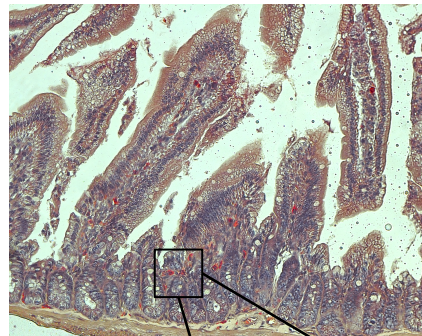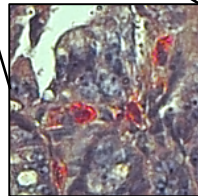



A

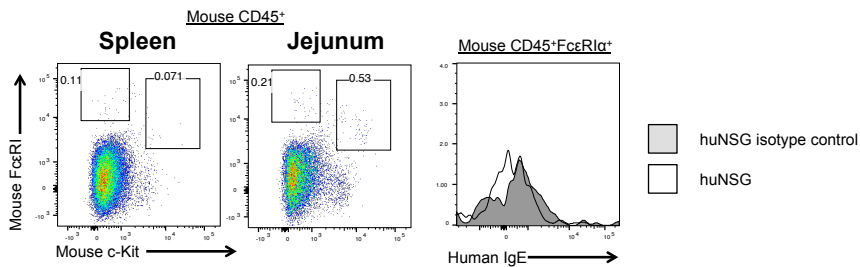

B

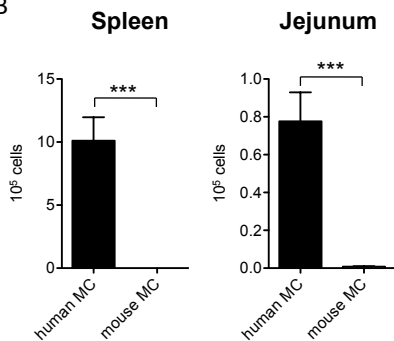

C

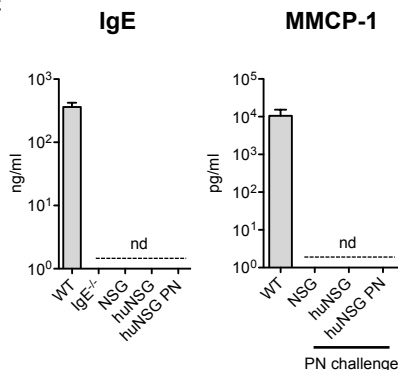

D

**Passive Anaphylaxis**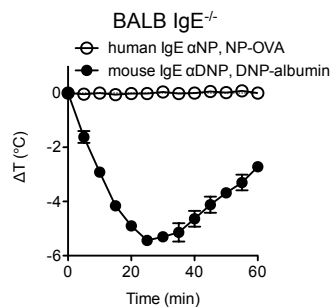

E

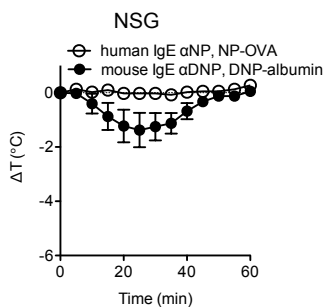

F

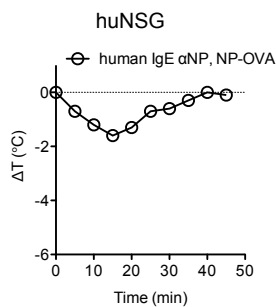

G

**MMCP-1**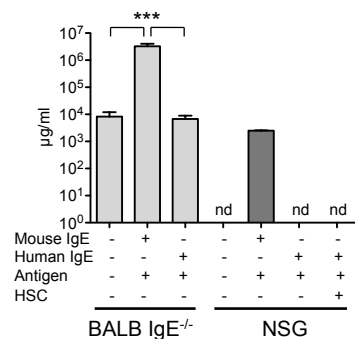

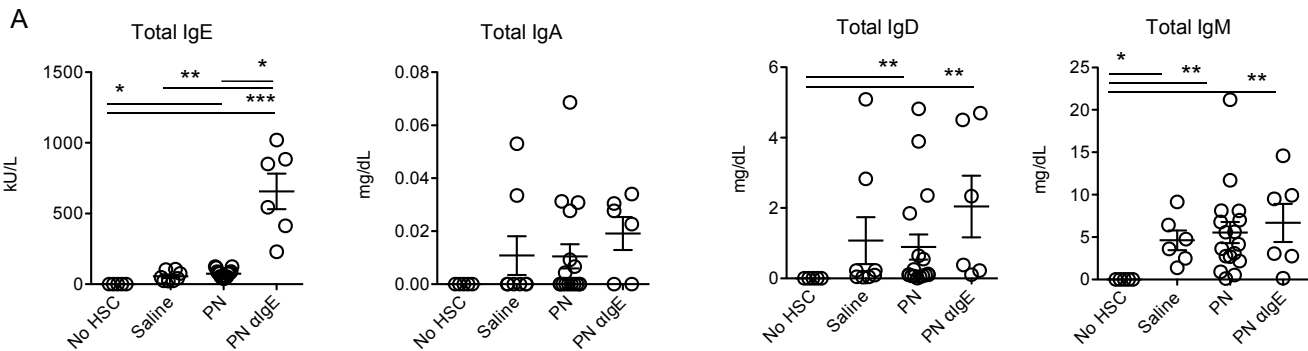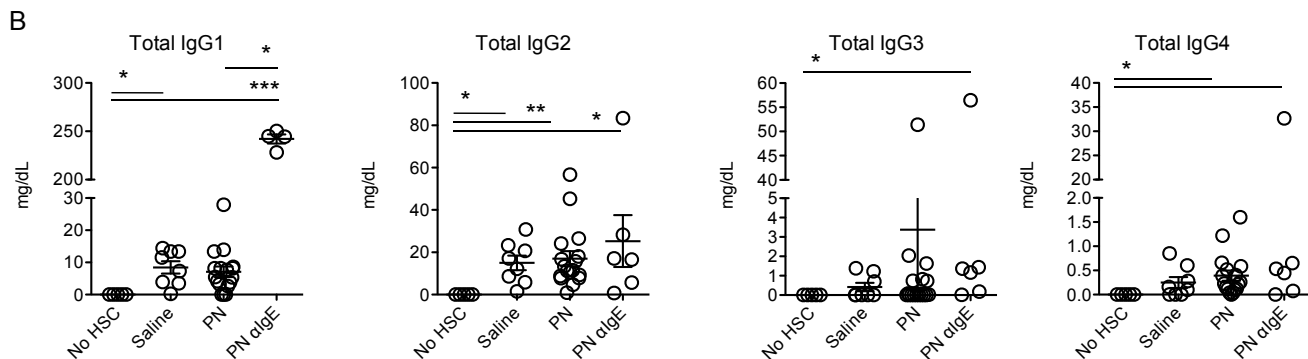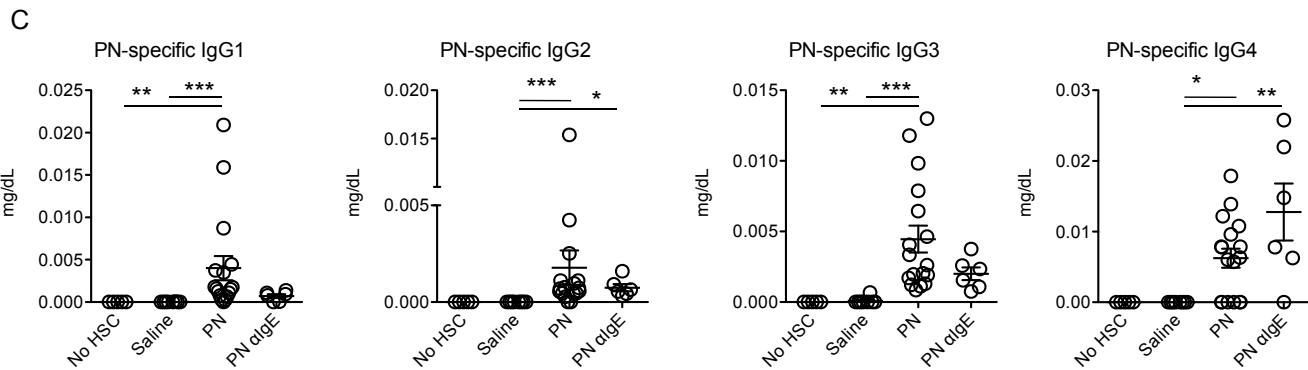

A

Murine

SpleenMurine CD45<sup>+</sup>Murine CD45<sup>+</sup>CD11c<sup>+</sup>MHCIIMurine MHCII (I-A<sup>g7</sup>)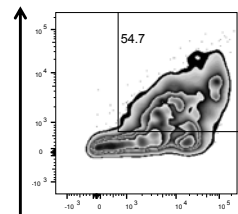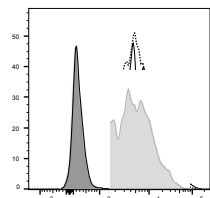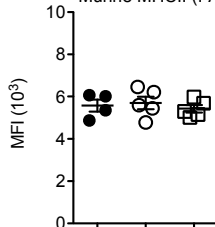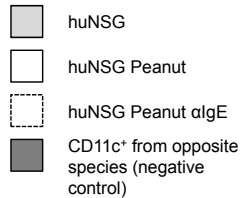

B

Jejunum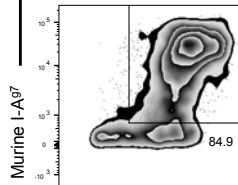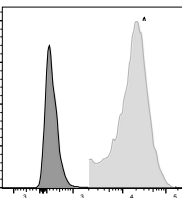Murine MHCII (I-A<sup>g7</sup>)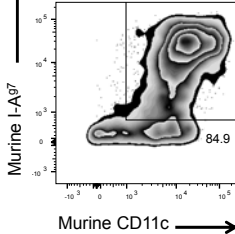Murine I-A<sup>g7</sup>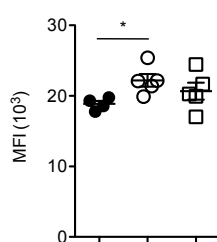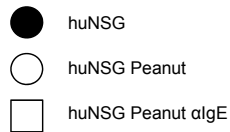

C

Human

SpleenHuman CD45<sup>+</sup>Human CD45<sup>+</sup>CD11c<sup>+</sup>HLA-DR<sup>+</sup>

HLA-DR

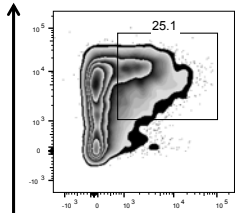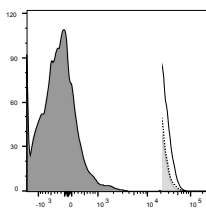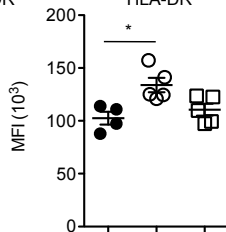

D

Jejunum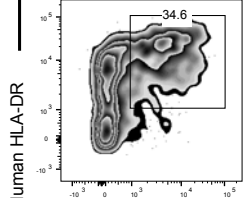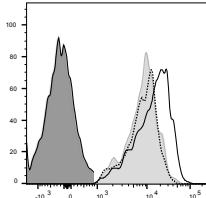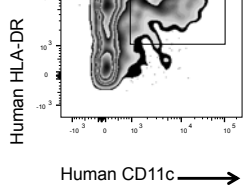

Human HLA-DR

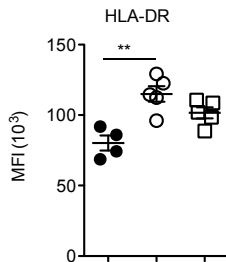

**Unimmunized**

**PN- & Tetanus-immunized**

Human CD11c<sup>+</sup>

Murine CD11c<sup>+</sup>

Human CD11c<sup>+</sup>

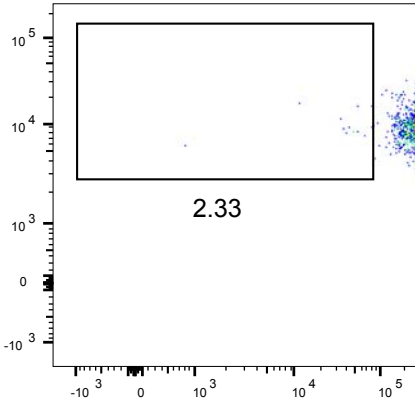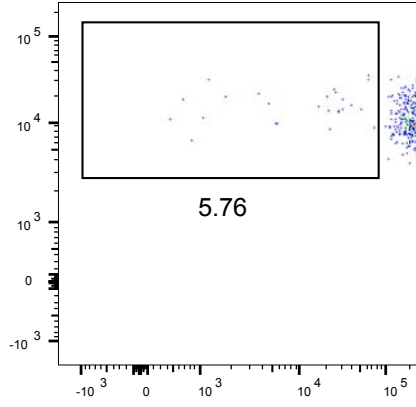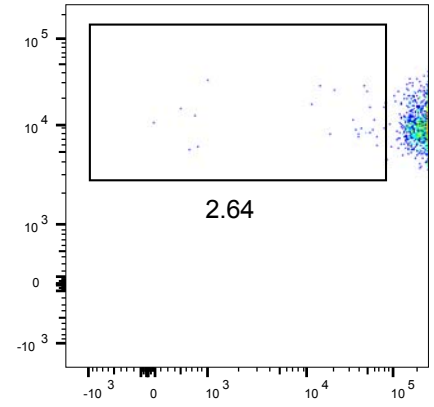

unstimulated

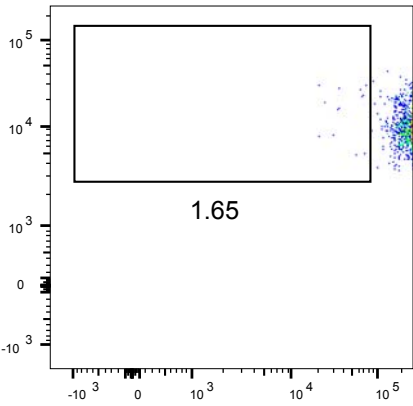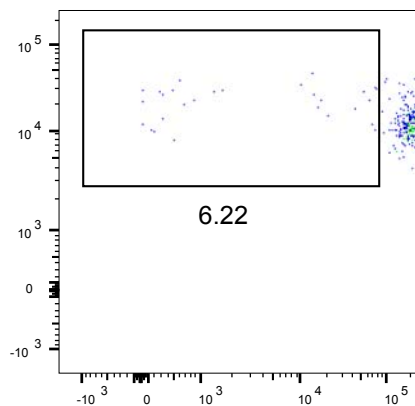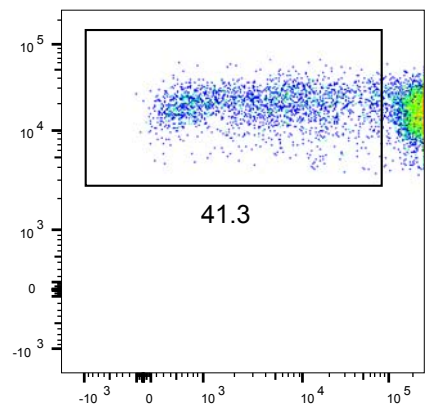

Tetanus

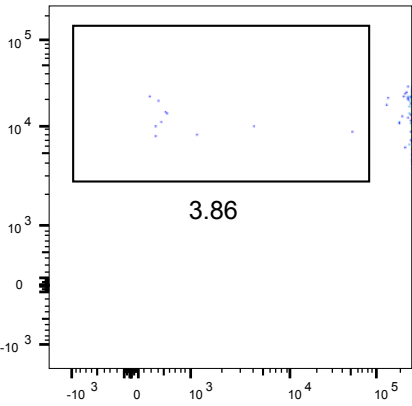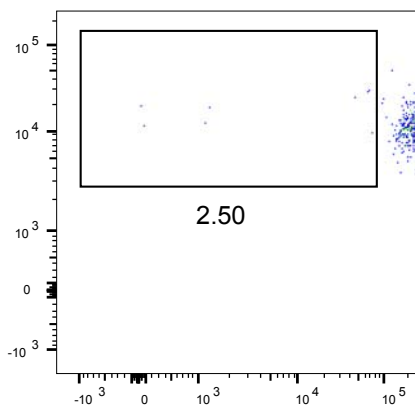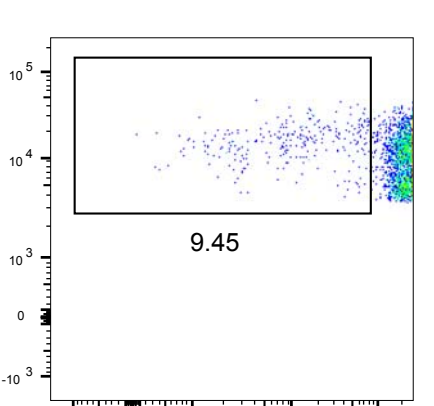

PN

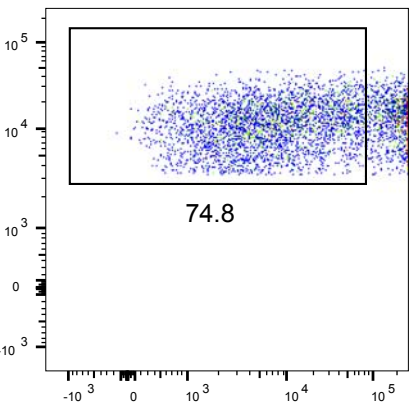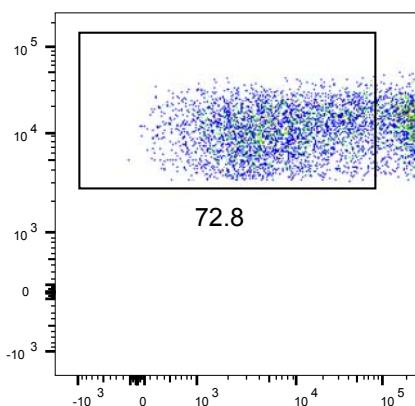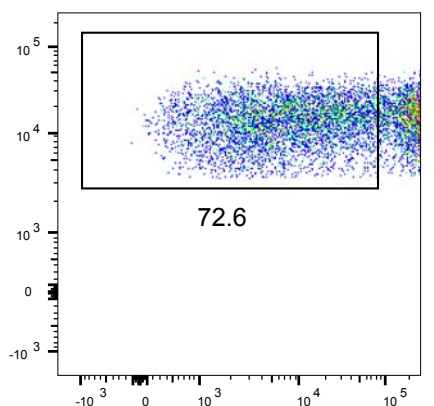

$\alpha$ CD3

CellTrace Violet (Proliferation)

↑ CD4

←

**A** Splenic MC

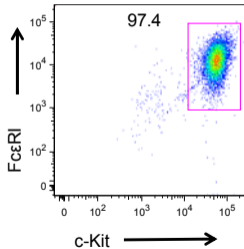

**B**

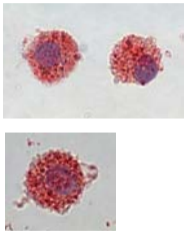

**C** Splenic MC

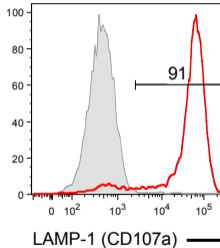

**BMMC**

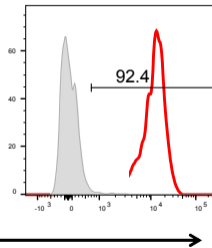

Legend:  
■ Unsensitized  
—  $\alpha$ PN serum
